# Supplementary material for: Paramedics in Primary Health Care: A feasibility study of the implementation of the Canadian Community Paramedicine at Clinic Program (CP@clinic) in rural Australia
Source: Research Square preprint supplement (doi:10.21203/rs.3.rs-6857738/v1), 2025-07-01
Supplement: Supplementary file 2 [file 5a2c3876c2e90e3a4574a758.docx]

**Community Paramedicine Pilot in Mildura LGA**

**Interviews - Clients**

**Welcome**

Thank you for agreeing to be part of this research. We appreciate your willingness to participate.

**Introduction**

Introduce convenors

**Purpose of Interview**

We are evaluating the new Community Paramedicine Pilot provided by Sunraysia Community Health Services. The aim of this interview is to learn more about your experience with the service and how it operates. We aim to evaluate the strengths and weaknesses of the services and the way it operates. We aim to improve the understanding of how service can improve health care and access to care for patients. The results of the evaluation will be used to improve the service and to look at ways to expand the service offered.

**Ground Rules**

1. There are no right or wrong answers. All person’s experiences and opinions are important.
2. What is said in this room stays here. We want people to feel comfortable sharing when sensitive issues come up.
3. We will be tape recording the interview.
   1. We want to capture everything you have to say and ensure we can remember it correctly.
   2. The recording will be stored privately and only the researchers in this project will have access to it. The recording will be deleted after a non-identifiable transcript of it has been completed
   3. We don’t identify anyone by name in our report. You will remain anonymous.
4. Participation is voluntary. If you want to a break or stop participating at any point please let us know.

**Questions**

1. What has been your involvement with the CP@program?

(Prompts: when did you start, why did you come along, how often have you come?)

1. Did you find the CP@ service helpful? What was the most helpful thing?
2. Is there anything additional that would have helped more/been useful as well?
3. What was different about working with the paramedics compared to working with other health providers or doctors?
4. What is different about your healthcare or social connections now compared to before seeing the paramedics? (Prompts: are you doing different things, connected to other people/services, trying other treatments, feeling more or less in control?)
5. What could be improved with the paramedic service?
6. Any other comments

Thank you for participating
