# Supplementary material for: Paramedics in Primary Health Care: A feasibility study of the implementation of the Canadian Community Paramedicine at Clinic Program (CP@clinic) in rural Australia
Source: Research Square preprint supplement (doi:10.21203/rs.3.rs-6857738/v1), 2025-07-01
Supplement: Supplementary file 3 [file 64d5dd9211b96cce39871f6c.docx]

**Community Paramedicine Pilot in Mildura LGA**

**Interviews - Paramedic**

**Welcome**

Thank you for agreeing to be part of this research. We appreciate your willingness to participate.

**Introduction**

**Purpose of Interview**

We are evaluating the new Community Paramedicine Pilot provided by Sunraysia Community Health Services. The aim of this interview is to learn more about your experience with the service and how it operates. We aim to evaluate the strengths and weaknesses of the services and the way it operates. We aim to improve the understanding of how service can improve health care and access to care for patients. The results of the evaluation will be used to improve the service and to look at ways to expand the service offered.

**Ground Rules**

1. There are no right or wrong answers. All person’s experiences and opinions are important.
2. What is said in this room stays here. We want people to feel comfortable sharing when sensitive issues come up.
3. We will be tape recording the interview.
   1. We want to capture everything you have to say and ensure we can remember it correctly.
   2. The recording will be stored privately and only the researchers in this project will have access to it. The recording will be deleted after a non-identifiable transcript of it has been completed
   3. We don’t identify anyone by name in our report. You will remain anonymous.
4. Participation is voluntary. If you want to a break or stop participating at any point please let us know.

**Questions**

We’ve got 8 questions to ask you today. As we only have 60 minutes, we might need to stop the discussion at some points to continue with the next question.

1. **How does the service operate?**

(Prompts: how it started, how it has developed, what happens in different locations)

1. **How has your experience been with the trial?**

(Prompts: What has been different compared to your previous paramedic experience? Has this been challenging and how? What skills and new ways of operating have you needed to develop?)

1. **How does the service align with the needs of the clients?**

(prompts: how are their needs addressed in the process of initial assessment? In the follow-up sessions? Which client needs are not being met? How might these needs be met?

1. **How has the service impacted the health and wellbeing of the patients?**

(Prompts: can you give examples of the service impact? What do you think have been the main benefits – what are the most important elements? E.g. location close to home, no appointment needed, use of screening tools, relationship building etc)

1. **How has the collaboration with other health service providers been?**

(Prompts: Who have you dealt with? Where are the gaps? Think specifically about the relationship with SCHS as a whole – what has been useful and what has been more difficult? Also the relationship with AV – how do you think this might work better?)

1. **What is good about the service?**
2. **What can be improved?**

(Prompts: consider systems/referral pathways; involvement of other supporting staff or health providers; services that are complementary to CP@).

**8) Any other comments?**

Thank you for participating
